# Supplementary material for: Association of occupations with decreased semen quality in eastern China: a cross-sectional study of 12 301 semen donors
Source: HighWire-hosted journal article supplement (doi:10.1136/bmjopen-2022-061354), 2022-08-01
Supplement: bmjopen-2022-061354supp001_data_supplement.pdf [file bmjopen-2022-061354supp001_data_supplement.pdf]

Supplementary table 1. Geographic characteristics, life habits, and disease histories of 12,301 semen donors

| Characteristic                | n (%)        |
|-------------------------------|--------------|
| Age, years                    |              |
| 18-30                         | 9996 (81.3)  |
| 30-39                         | 2062 (16.8)  |
| 40-50                         | 239 (1.9)    |
| Ethnicity                     |              |
| Han                           | 12054 (98.0) |
| Others                        | 247 (2.0)    |
| Education                     |              |
| High school                   | 4669 (38.0)  |
| Junior college                | 6272 (51.0)  |
| Undergraduate or higher       | 1360 (11.1)  |
| Marital status                |              |
| Unmarried                     | 10033 (81.6) |
| Married                       | 2169 (17.6)  |
| Divorced                      | 99 (0.8)     |
| Childbearing history          |              |
| Never                         | 10720 (87.1) |
| Ever                          | 1581 (12.9)  |
| Native geographical region    |              |
| South                         | 9151 (74.4)  |
| North                         | 3150 (25.6)  |
| Smoking habit                 |              |
| Non-smoker                    | 4327 (35.2)  |
| Smoker                        | 186 (1.5)    |
| NA                            | 7788 (63.3)  |
| Drinking habit                |              |
| Never                         | 4506 (36.6)  |
| Ever                          | 7 (0.1)      |
| NA                            | 7788 (63.3)  |
| Overweight or fat             |              |
| No                            | 3901 (31.7)  |
| Yes                           | 608 (5.0)    |
| NA                            | 7792 (63.3)  |
| Hypertension                  |              |
| No                            | 4495 (36.5)  |
| Yes                           | 10 (0.1)     |
| NA                            | 7796 (63.4)  |
| History of testicular surgery |              |
| No                            | 4511 (36.7)  |
| Yes                           | 2 (0.0)      |
| NA                            | 7788 (63.3)  |

NA: not available

Supplementary table 2. Semen quality parameters among different professions

| Occupation                        | <i>n</i> (%) | Semen volume (ml) | Sperm concentration (10 <sup>6</sup> /ml) | Sperm count (10 <sup>6</sup> ) | Sperm mobility (%) |
|-----------------------------------|--------------|-------------------|-------------------------------------------|--------------------------------|--------------------|
| College students                  | 4450 (36.2)  | 3.3 (2.5-4.5)     | 63.7 (44.8-83.7)                          | 210 (141-290)                  | 49.0 (40.3-55.0)   |
| Business                          | 1756 (14.3)  | 3.3 (2.5-4.5)     | 59.5 (41.0-78.4)                          | 197 (126-282)                  | 48.2 (40.0-53.0)   |
| IT industry                       | 975 (7.9)    | 3.5 (2.6-4.6)     | 60.0 (41.8-79.0)                          | 211 (135-289)                  | 47.0 (39.0-51.5)   |
| Architectural engineering         | 706 (5.7)    | 3.6 (2.8-4.8)     | 61.8 (44.0-80.0)                          | 220 (152-307)                  | 48.5 (40.0-53.5)   |
| Human health                      | 276 (2.2)    | 3.7 (2.7-4.7)     | 60.2 (43.4-82.3)                          | 214 (142-299)                  | 47.0 (40.0-51.1)   |
| Culture or education              | 318 (2.6)    | 3.7 (2.8-4.6)     | 60.2 (41.0-78.3)                          | 213 (137-299)                  | 47.0 (38.2-52.0)   |
| Finance or insurance              | 416 (3.4)    | 3.3 (2.3-4.3)     | 60.0 (41.0-81.0)                          | 200 (123-282)                  | 48.6 (38.2-53.8)   |
| Soldier or police                 | 134 (1.1)    | 3.8 (2.6-4.8)     | 53.6 (40.4-75.1)                          | 191 (131-302)                  | 45.5 (38.0-52.8)   |
| Commercial service                | 586 (4.8)    | 3.7 (2.7-5.0)     | 59.9 (41.0-79.0)                          | 210 (141-301)                  | 47.0 (39.0-52.0)   |
| Civil servant                     | 261 (2.1)    | 3.1 (2.3-4.1)     | 61.4 (44.0-80.5)                          | 197 (120-280)                  | 49.4 (41.2-55.3)   |
| Industrial and mining enterprises | 139 (1.1)    | 3.0 (2.3-4.0)     | 65.5 (45.8-84.5)                          | 198 (135-270)                  | 48.0 (38.4-55.0)   |
| Transportation                    | 119 (1.0)    | 3.3 (2.4-4.2)     | 60.0 (44.5-78.9)                          | 200 (117-300)                  | 49.0 (39.0-54.2)   |
| Entertainment and sports          | 166 (1.3)    | 3.0 (2.3-4.0)     | 62.5 (43.0-80.8)                          | 187 (109-251)                  | 52.2 (40.0-58.1)   |
| Others                            | 1460 (11.9)  | 3.4 (2.5-4.4)     | 62.2 (43.8-80.3)                          | 204 (138-282)                  | 49.5 (40.0-55.0)   |
| Unemployed                        | 539 (4.4)    | 3.5 (2.5-4.7)     | 56.0 (38.7-73.5)                          | 194 (119-275)                  | 48.0 (39.0-52.5)   |

IT: Information Technology
